# Supplementary material for: Vitamin A Impairs the Reprogramming of Tregs into IL-17-Producing Cells during Intestinal Inflammation
Source: Hindawi journal article supplement (doi:10.1155/2015/137893), 2015-01-01

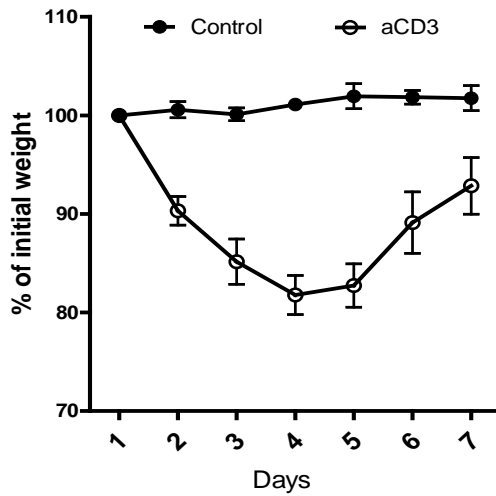

**Supplementary figure 1: Intestinal inflammation as determined by changes in body weight after anti-CD3 antibody treatment.** Mice were injected intraperitoneally two times (day 1 and 3) with either anti-CD3 antibody or PBS as a control. Body weight was recorded daily from day 1 to 7. The changes in body weight is expressed as a percentage of the initial weight at day 1. Mean  $\pm$  SEM are shown.

A-

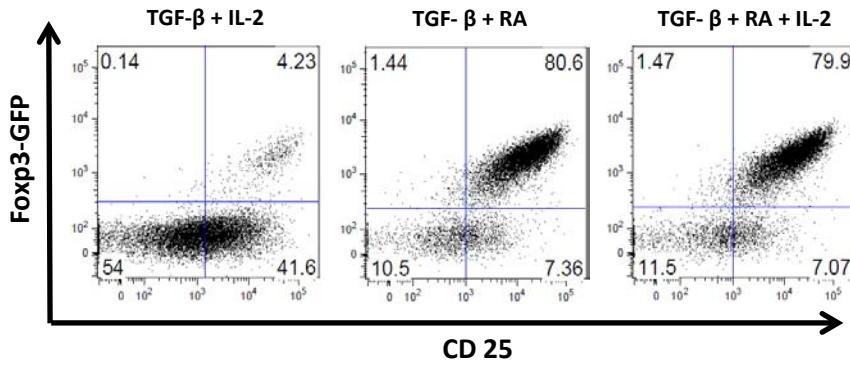

B-

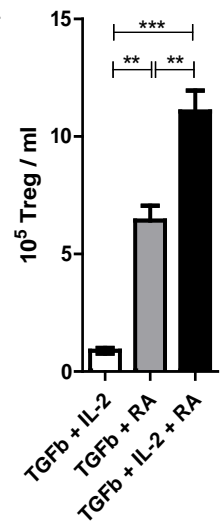

Supplement: f1 [file 137893.f1.pdf]
